# Supplementary material for: Epidemiological characteristics of confirmed COVID-19 in Guizhou province, China
Source: Disaster Med Public Health Prep. 2020 May 5:1–7. doi: 10.1017/dmp.2020.134 (PMC7251290; doi:10.1017/dmp.2020.134)
Supplement: Supplementary file 1 [file S1935789320001342sup001.xlsx]

## Sheet: MI from Jan.6 to Feb.12
Date	Guiyang[%]	Zunyi[%]	Anshun[%]	Liupanshui[%]	Tongren[%]	Bijie[%]	Qiannan[%]	Qiandong[%]	Qianxi[%]
Jan.6	0.75	0.5	0	0	0.28	0.33	0.27	0.33	0
Jan.7	0.76	0.47	0	0	0.31	0.31	0.26	0.31	0
Jan.8	0.77	0.53	0	0	0.34	0.36	0.26	0.31	0
Jan.9	0.72	0.58	0	0	0.38	0.36	0.26	0.34	0
Jan.10	0.65	0.47	0	0	0.4	0.28	0	0.29	0
Jan.11	0.61	0.43	0	0	0.31	0.28	0	0.24	0
Jan.12	0.53	0.4	0	0	0.29	0.32	0	0.25	0
Jan.13	0.55	0.46	0	0	0.32	0.3	0	0.24	0
Jan.14	0.48	0.42	0	0	0.29	0.31	0	0.24	0
Jan.15	0.35	0.39	0	0	0.28	0.27	0	0	0
Jan.16	0.37	0.35	0	0	0.29	0	0	0	0
Jan.17	0.34	0.33	0	0	0.26	0	0	0	0
Jan.18	0.33	0.32	0	0	0	0	0	0	0
Jan.19	0.28	0.29	0	0	0.27	0	0	0	0
Jan.20	0.3	0.31	0	0	0.3	0	0	0	0
Jan.21	0.28	0.31	0	0	0.26	0	0	0	0
Jan.22	0.25	0.25	0	0	0	0	0	0	0
Jan.23	0	0.23	0	0	0.22	0	0	0	0
Jan.24	0.22	0.24	0	0	0.2	0	0	0	0
Jan.25	0.43	0.28	0	0	0.27	0	0	0	0
Jan.26	0.63	0.26	0	0	0.25	0.14	0	0	0
Jan.27	0.51	0.14	0.14	0.13	0	0	0	0	0
Jan.28	0.36	0.15	0	0	0	0	0	0	0
Jan.29	0.31	0.12	0	0	0	0	0	0	0
Jan.30	0.26	0.15	0	0	0.12	0	0	0	0
Jan.31	0.21	0.1	0	0	0.11	0	0	0	0
Feb.1	0.17	0	0	0	0	0	0	0	0
Feb.2	0.12	0.12	0	0	0	0	0	0	0
Feb.3	0.11	0.1	0	0	0	0	0	0	0
Feb.4	0.13	0.12	0	0	0	0	0	0	0
Feb.5	0.15	0	0	0	0.1	0	0	0	0
Feb.6	0.09	0.08	0	0	0.08	0	0	0	0
Feb.7	0	0	0	0	0.12	0	0	0	0		Areas	Average daily migration index[%]	Accummlative cases[Number]
Feb.8	0.1	0.09	0	0	0	0	0	0	0		Guiyang	0.321316	33
Feb.9	0	0	0	0	0.08	0	0	0	0		Zunyi	0.239474	25
Feb.10	0	0	0	0	0.2	0	0	0	0		Anshun	0.00368421	4
Feb.11	0.09	0.11	0	0	0	0	0	0	0		Liupanshui	0.00342105	10
Feb.12	0	0	0	0	0.2	0	0	0	0		Tongren	0.171842	10
Mean[%]	0.321316	0.239474	0.00368421	0.00342105	0.171842	0.0857895	0.0276316	0.0671053	0		Bijie	0.0857895	22
Cases[Number]	33	25	4	10	10	22	17	10	4		Qiannan	0.0276316	17
											Qiandong	0.0671053	10
											Qianxi	0	4
											Total of Guizhou	0.920263	135
											*Correlation coefficient r=0.816; P-value=0.007

## Sheet: MI from Jan.1 to Feb.12
Date	Guiyang[%]	Zunyi[%]	Anshun[%]	Liupanshui[%]	Tongren[%]	Bijie[%]	Qiannan[%]	Qiandong[%]	Qianxi[%]
Jan.1	0.54	0.3	0	0	0.24	0	0	0.2	0
Jan.2	0.69	0.34	0	0	0.25	0.25	0	0.32	0
Jan.3	0.72	0.4	0	0	0.26	0.26	0	0.25	0
Jan.4	0.7	0.45	0	0	0.26	0.29	0	0.29	0
Jan.5	0.79	0.45	0	0	0.25	0.24	0	0.28	0
Jan.6	0.75	0.5	0	0	0.28	0.33	0.27	0.33	0
Jan.7	0.76	0.47	0	0	0.31	0.31	0.26	0.31	0
Jan.8	0.77	0.53	0	0	0.34	0.36	0.26	0.31	0
Jan.9	0.72	0.58	0	0	0.38	0.36	0.26	0.34	0
Jan.10	0.65	0.47	0	0	0.4	0.28	0	0.29	0
Jan.11	0.61	0.43	0	0	0.31	0.28	0	0.24	0
Jan.12	0.53	0.4	0	0	0.29	0.32	0	0.25	0
Jan.13	0.55	0.46	0	0	0.32	0.3	0	0.24	0
Jan.14	0.48	0.42	0	0	0.29	0.31	0	0.24	0
Jan.15	0.35	0.39	0	0	0.28	0.27	0	0	0
Jan.16	0.37	0.35	0	0	0.29	0	0	0	0
Jan.17	0.34	0.33	0	0	0.26	0	0	0	0
Jan.18	0.33	0.32	0	0	0	0	0	0	0
Jan.19	0.28	0.29	0	0	0.27	0	0	0	0
Jan.20	0.3	0.31	0	0	0.3	0	0	0	0
Jan.21	0.28	0.31	0	0	0.26	0	0	0	0
Jan.22	0.25	0.25	0	0	0	0	0	0	0
Jan.23	0	0.23	0	0	0.22	0	0	0	0
Jan.24	0.22	0.24	0	0	0.2	0	0	0	0
Jan.25	0.43	0.28	0	0	0.27	0	0	0	0
Jan.26	0.63	0.26	0	0	0.25	0.14	0	0	0
Jan.27	0.51	0.14	0.14	0.13	0	0	0	0	0
Jan.28	0.36	0.15	0	0	0	0	0	0	0
Jan.29	0.31	0.12	0	0	0	0	0	0	0
Jan.30	0.26	0.15	0	0	0.12	0	0	0	0
Jan.31	0.21	0.1	0	0	0.11	0	0	0	0
Feb.1	0.17	0	0	0	0	0	0	0	0
Feb.2	0.12	0.12	0	0	0	0	0	0	0
Feb.3	0.11	0.1	0	0	0	0	0	0	0
Feb.4	0.13	0.12	0	0	0	0	0	0	0
Feb.5	0.15	0	0	0	0.1	0	0	0	0			Areas	Average daily migration index[%]	Accummlative cases[Number]
Feb.6	0.09	0.08	0	0	0.08	0	0	0	0			Guiyang	0.363953	33
Feb.7	0	0	0	0	0.12	0	0	0	0			Zunyi	0.256744	25
Feb.8	0.1	0.09	0	0	0	0	0	0	0			Anshun	0.00325581	4
Feb.9	0	0	0	0	0.08	0	0	0	0			Liupanshui	0.00302326	10
Feb.10	0	0	0	0	0.2	0	0	0	0			Tongren	0.181163	10
Feb.11	0.09	0.11	0	0	0	0	0	0	0			Bijie	0.1	22
Feb.12	0	0	0	0	0.2	0	0	0	0			Qiannan	0.0244186	17
Mean[%]	0.363953	0.256744	0.00325581	0.00302326	0.181163	0.1	0.0244186	0.0904651	0			Qiandong	0.0904651	10
Cases[Number]	33	25	4	10	10	22	17	10	4			Qianxi	0	4
												Total of Guizhou	1.02302	135
												Correlation coefficient r=0.821; P-value=0.007
